# Supplementary material
Source: Research Square preprint supplement (doi:10.21203/rs.3.rs-9682608/v2)
Supplement: Supplementary file 1 [file 6f78313c2182c9d3d1221e64.docx]

Table 1

**Table 1.** Age-adjusted mortality rates per 100,000, stratified by sex in the United States, 1999 to 2025.

| Age-Adjusted Mortality Rate (95% CI) | | | | | | | | | |
| --- | --- | --- | --- | --- | --- | --- | --- | --- | --- |
| **YEAR** | **OVERALL** | | | **FEMALE** | | | **MALE** | | |
| 1999 | 0.32 (0.262-0.378) | | | 0.343 (0.27-0.431) | | | 0.32 (0.229-0.436) | | |
| 2000 | 0.32 (0.261-0.379) | | | 0.285 (0.218-0.365) | | | 0.391 (0.29-0.515) | | |
| 2001 | 0.432 (0.362-0.502) | | | 0.385 (0.304-0.48) | | | 0.492 (0.379-0.629) | | |
| 2002 | 0.48 (0.408-0.552) | | | 0.432 (0.346-0.533) | | | 0.569 (0.45-0.71) | | |
| 2003 | 0.62 (0.538-0.702) | | | 0.572 (0.471-0.674) | | | 0.651 (0.526-0.797) | | |
| 2004 | 0.568 (0.488-0.647) | | | 0.432 (0.351-0.526) | | | 0.688 (0.557-0.841) | | |
| 2005 | 0.632 (0.553-0.712) | | | 0.601 (0.495-0.707) | | | 0.811 (0.664-0.958) | | |
| 2006 | 4.033 (3.829-4.237) | | | 2.775 (2.559-2.992) | | | 5.881 (5.487-6.275) | | |
| 2007 | 4.945 (4.721-5.169) | | | 3.372 (3.133-3.611) | | | 7.307 (6.874-7.741) | | |
| 2008 | 5.576 (5.341-5.811) | | | 3.823 (3.569-4.076) | | | 8.327 (7.868-8.786) | | |
| 2009 | 6.063 (5.82-6.306) | | | 3.901 (3.649-4.153) | | | 9.292 (8.813-9.772) | | |
| 2010 | 6.947 (6.688-7.207) | | | 4.741 (4.463-5.019) | | | 10.156 (9.66-10.652) | | |
| 2011 | 7.381 (7.117-7.645) | | | 5.024 (4.741-5.306) | | | 10.825 (10.32-11.331) | | |
| 2012 | 8.111 (7.837-8.386) | | | 5.625 (5.329-5.921) | | | 11.622 (11.106-12.138) | | |
| 2013 | 8.816 (8.534-9.097) | | | 6.069 (5.767-6.372) | | | 12.692 (12.162-13.222) | | |
| 2014 | 10.498 (10.194-10.802) | | | 7.371 (7.04-7.702) | | | 14.898 (14.33-15.466) | | |
| 2015 | 12.616 (12.285-12.946) | | | 8.694 (8.338-9.05) | | | 17.974 (17.358-18.59) | | |
| 2016 | 13.853 (13.511-14.195) | | | 9.825 (9.45-10.199) | | | 19.421 (18.789-20.052) | | |
| 2017 | 15.033 (14.682-15.383) | | | 10.598 (10.214-10.982) | | | 21.192 (20.542-21.841) | | |
| 2018 | 15.682 (15.329-16.034) | | | 10.795 (10.413-11.178) | | | 22.383 (21.728-23.038) | | |
| 2019 | 17.153 (16.789-17.516) | | | 12.214 (11.813-12.615) | | | 23.815 (23.151-24.479) | | |
| 2020 | 20.149 (19.76-20.538) | | | 14.543 (14.11-14.977) | | | 27.704 (26.997-28.411) | | |
| 2021 | 19.722 (19.329-20.114) | | | 14.445 (14.003-14.887) | | | 26.892 (26.181-27.603) | | |
| 2022 | 19.752 (19.373-20.132) | | | 14.309 (13.885-14.732) | | | 27.17 (26.476-27.863) | | |
| 2023 | 18.497 (18.133-18.862) | | | 13.584 (13.172-13.996) | | | 24.986 (24.332-25.639) | | |
| 2024 | 19.315 (18.95-19.68) | | | 14.027(13.616-14.438) | | | 26.236 (25.582-26.89) | | |
| 2025 | 19.353 (18.988-19.718) | | | 13.959 (13.549-14.369) | | | 26.518 (25.861-27.176) | | |

*Abbreviations: CI, Confidence Interval*

**Table 2.** Age-adjusted mortality rates per 100,000, stratified by census region in the United States, 1999 to 2025

| Age-Adjusted Mortality Rate (95% CI) | | | | |
| --- | --- | --- | --- | --- |
| **Year** | **Northwest** | **Midwest** | **South** | **West** |
| 1999 | 0.283 (0.173-0.437) | 0.368 (0.252-0.519) | 0.296 (0.207-0.409) | 0.445 (0.298-0.638) |
| 2000 | 0.266 (0.145-0.387) | 0.296 (0.193-0.433) | 0.291 (0.203-0.405) | 0.48 (0.332-0.671) |
| 2001 | 0.343 (0.228-0.496) | 0.42 (0.294-0.582) | 0.369 (0.27-0.492) | 0.545 (0.383-0.751) |
| 2002 | 0.325 (0.21-0.479) | 0.694 (0.526-0.9) | 0.398 (0.294-0.528) | 0.556 (0.397-0.756) |
| 2003 | 0.54 (0.386-0.735) | 0.843 (0.655-1.069) | 0.496 (0.38-0.635) | 0.685 (0.511-0.898) |
| 2004 | 0.428 (0.298-0.595) | 0.68 (0.514-0.883) | 0.468 (0.356-0.603) | 0.585 (0.426-0.782) |
| 2005 | 0.517 (0.369-0.704) | 0.919 (0.731-1.14) | 0.449 (0.347-0.572) | 0.792 (0.6-1.027) |
| 2006 | 3.393 (2.983-3.804) | 5.081 (4.609-5.553) | 3.039 (2.742-3.336) | 5.051 (4.551-5.551) |
| 2007 | 4.02 (3.576-4.465) | 6.686 (6.146-7.226) | 3.72 (3.396-4.045) | 5.899 (5.363-6.436) |
| 2008 | 4.743 (4.261-5.226) | 7.253 (6.69-7.812) | 4.101 (3.764-4.437) | 7.083 (6.501-7.665) |
| 2009 | 5.19 (4.68-5.692) | 7.653 (7.082-8.223) | 4.68 (4.324-5.036) | 7.493 (6.9-8.085) |
| 2010 | 5.544 (5.026-6.061) | 8.939 (8.322-9.556) | 5.207 (4.831-5.582) | 9.117 (8.468-9.766) |
| 2011 | 5.825 (5.296-6.354) | 9.137 (8.519-9.755) | 5.4 (5.025-5.776) | 10.403 (9.721-11.085) |
| 2012 | 7.286 (6.699-7.873) | 9.606 (8.977-10.235) | 6.601 (6.191-7.01) | 9.816 (9.164-10.468) |
| 2013 | 7.104 (6.529-7.68) | 10.986 (10.321-11.651) | 6.836 (6.428-7.244) | 11.532 (10.84-12.227) |
| 2014 | 7.86 (7.258-8.461) | 13.219 (12.494-13.944) | 8.522 (8.07-8.974) | 13.499 (12.76-14.241) |
| 2015 | 9.513 (8.85-10.176) | 15.066 (14.294-15.837) | 10.97 (10.464-11.476) | 15.672 (14.89-16.458) |
| 2016 | 10.194 (9.519-10.868) | 16.718 (15.91-17.526) | 12.679 (12.143-13.215) | 16.261 (15.472-17.05) |
| 2017 | 10.975 (10.284-11.667) | 18.662 (17.822-19.502) | 13.753 (13.204-14.302) | 17.347 (16.54-18.152) |
| 2018 | 12.182 (11.466-12.898) | 18.947 (18.114-19.78) | 14.215 (13.666-14.763) | 17.832 (17.03-18.631) |
| 2019 | 12.592 (11.87-13.314) | 20.156 (19.306-1.006) | 16.417 (15.837-16.997) | 19.373 (18.55-20.193) |
| 2020 | 15.314 (14.524-16.104) | 25.113 (24.172-26.055) | 18.676 (18.066-19.286) | 22.042 (21.18-22.906) |
| 2021 | 14.668 (13.891-15.445) | 23.136 (22.212-24.06) | 18.428 (17.808-19.048) | 23.14 (22.23-24.046) |
| 2022 | 14.825 (14.064-15.586) | 23.057 (22.165-23.949) | 18.727 (18.125-19.329) | 22.469 (21.6-23.328) |
| 2023 | 13.247 (12.534-13.959) | 22.573 (21.697-23.45) | 17.869 (17.285-18.452) | 20.163 (19.36-20.969) |
| 2024 | 15.156 (14.407-15.905) | 23.656 (22.773-24.538) | 18.215 (17.639-18.791) | 20.506 (19.7-21.298) |
| 2025 | 15.175 (14.426-15.923) | 23.696 (22.811-24.581) | 18.334 (17.756-18.912) | 20.657 (19.86-21.453) |

*Abbreviations: CI, Confidence Interval*

**Table 3.** Crude mortality rates per 100,000, stratified by age group in the United States, 1999 to 2025.

| Crude Mortality Rate (95% CI) | | | |
| --- | --- | --- | --- |
| **YEAR** | **65-74 YEAR OLDS** | **75-84 YEAR OLDS** | **85+ YEAR OLD** |
| 1999 | 0.22 (0.16-0.30) | 0.434 (0.325-0.567) | 0.554 (0.351-0.831) |
| 2000 | 0.19 (0.13-0.27) | 0.437 (0.328-0.57) | 0.59 (0.382-0.87) |
| 2001 | 0.28 (0.21-0.37) | 0.484 (0.371-0.622) | 0.812 (0.565-1.129) |
| 2002 | 0.32 (0.24-0.41) | 0.556 (0.434-0.702) | 0.938 (0.673-1.273) |
| 2003 | 0.47 (0.38-0.58) | 0.737 (0.596-0.901) | 0.896 (0.64-1.22) |
| 2004 | 0.37 (0.29-0.47) | 0.654 (0.523-0.809) | 0.924 (0.666-1.249) |
| 2005 | 0.53 (0.43-0.63) | 0.727 (0.588-0.888) | 1.044 (0.772-1.38) |
| 2006 | 1.76 (1.57-1.95) | 5.483 (5.082-5.884) | 9.269 (8.413-10.124) |
| 2007 | 1.99 (1.79-2.19) | 7.473 (7.004-7.941) | 10.1 (9.223-10.978) |
| 2008 | 2.40 (2.19-2.62) | 8.114 (7.626-8.602) | 11.836 (10.901-12.772) |
| 2009 | 2.50 (2.29-2.71) | 8.608 (8.104-9.112) | 13.918 (12.92-14.916) |
| 2010 | 2.78 (2.56-3.00) | 10.214 (9.665-10.762) | 15.182 (14.151-16.212) |
| 2011 | 2.82 (2.60-3.04) | 10.808 (10.247-11.37) | 16.977 (15.911-18.043) |
| 2012 | 2.96 (2.74-3.17) | 11.701 (11.119-12.283) | 19.466 (18.339-20.593) |
| 2013 | 3.44 (3.21-3.67) | 12.271 (11.679-12.863) | 21.835 (20.657-23.013) |
| 2014 | 3.81 (3.58-4.05) | 14.975 (14.327-15.624) | 26.013 (24.74-27.287) |
| 2015 | 4.27 (4.03-4.52) | 18.379 (17.667-19.092) | 31.318 (29.934-32.701) |
| 2016 | 4.94 (4.68-5.20) | 19.988 (19.254-20.722) | 34.152 (32.718-35.586) |
| 2017 | 5.25 (4.99-5.51) | 21.507 (20.758-22.257) | 38.246 (36.739-39.753) |
| 2018 | 5.48 (5.21-5.74) | 22.313 (21.567-23.06) | 39.927 (38.396-41.458) |
| 2019 | 5.95 (5.68-6.22) | 24.252 (23.488-25.016) | 44.391 (42.784-45.998) |
| 2020 | 7.09 (6.80-7.38) | 28.836 (28.016-29.657) | 50.718 (49.007-52.428) |
| 2021 | 6.40 (6.13-6.67) | 27.946 (27.132-28.76) | 52.78 (50.938-54.622) |
| 2022 | 6.47 (6.20-6.74) | 28.646 (27.854-29.439) | 50.618 (48.886-52.349) |
| 2023 | 6.46 (6.19-6.73) | 26.149 (25.409-26.888) | 47.587 (45.869-49.305) |
| 2024 | 6.56 (6.29-6.82) | 27.627 (26.886-28.369) | 49.478 (47.76-51.197) |
| 2025 | 6.52 (6.25-6.79) | 28.218 (27.468-28.967) | 48.515 (46.813-50.217) |

*Abbreviations: CI, Confidence Interval*

**Table 4.** Age-adjusted mortality rates per 100,000, stratified by urbanization in the United States, 1999 to 2020

| Age-Adjusted Mortality Rate (95% CI) | | |
| --- | --- | --- |
| **YEAR** | **METROPOLITAN** | **NON-METROPOLITAN** |
| 1999 | 0.308 (0.248-0.377) | 0.368 (0.236-0.547) |
| 2000 | 0.32 (0.257-0.393) | 0.326 (0.209-0.486) |
| 2001 | 0.432 (0.354-0.511) | 0.426 (0.285-0.612) |
| 2002 | 0.445 (0.371-0.519) | 0.44 (0.299-0.625) |
| 2003 | 0.556 (0.473-0.638) | 0.721 (0.532-0.956) |
| 2004 | 0.516 (0.434-0.597) | 0.621 (0.448-0.84) |
| 2005 | 0.632 (0.543-0.722) | 0.756 (0.564-0.991) |
| 2006 | 4.069 (3.843-4.294) | 3.658 (3.21-4.105) |
| 2007 | 4.885 (4.639-5.132) | 5.205 (4.672-5.739) |
| 2008 | 5.613 (5.352-5.873) | 5.429 (4.885-5.972) |
| 2009 | 6.023 (5.755-6.291) | 6.131 (5.558-6.704) |
| 2010 | 6.848 (6.564-7.133) | 7.305 (6.68-7.93) |
| 2011 | 7.341 (7.051-7.631) | 7.404 (6.782-8.026) |
| 2012 | 8.218 (7.914-8.522) | 7.478 (6.859-8.097) |
| 2013 | 9.008 (8.693-9.322) | 8.124 (7.487-8.762) |
| 2014 | 10.69 (10.352-11.028) | 9.461 (8.776-10.145) |
| 2015 | 12.893 (12.524-13.261) | 11.327 (10.582-12.072) |
| 2016 | 14.071 (13.692-14.45) | 12.917 (12.127-13.707) |
| 2017 | 15.122 (14.736-15.509) | 14.793 (13.954-15.633) |
| 2018 | 15.649 (15.262-16.036) | 15.887 (15.03-16.745) |
| 2019 | 17.233 (16.834-17.633) | 16.599 (15.732-17.466) |
| 2020 | 20.016 (19.59-20.442) | 20.785 (19.826-21.743) |

*Abbreviations: CI, Confidence Interval*

**Table 5.** Age-adjusted mortality rates per 100,000, stratified by race in the United States, 1999 to 2025.

| Age-Adjusted Mortality Rate (95% CI) | | | | |
| --- | --- | --- | --- | --- |
| **Year** | **Asian or Pacific Islander** | **Black or African American** | **White** | **Hispanic or Latino** |
| 2007 | 1.96 (1.228-2.968) | 1.056 (0.722-1.491) | 5.373 (5.126-5.62) | 1.427 (0.963-2.038) |
| 2008 | 2.335 (1.564-3.353) | 1.635 (1.213-2.155) | 6.128 (5.865-6.392) | 1.735 (1.222-2.392) |
| 2009 | 2.24 (1.488-3.237) | 2.028 (1.562-2.59) | 6.591 (6.321-6.861) | 1.735 (1.245-2.353) |
| 2010 | 2.84 (2-3.915) | 2.187 (1.708-2.758) | 7.581 (7.292-7.871) | 2.201 (1.654-2.872) |
| 2011 | 3.452 (2.554-4.564) | 2.378 (1.886-2.96) | 8.051 (7.755-.346) | 3.038 (2.406-3.787) |
| 2012 | 3.074 (2.267-4.076) | 3.197 (2.601-3.793) | 8.853 (8.546-9.16) | 3.52 (2.858-4.29) |
| 2013 | 5.139 (4.105-6.355) | 3.388 (2.791-3.985) | 9.55 (9.23-9.86) | 3.702 (3.008-4.4) |
| 2014 | 4.404 (3.481-5.496) | 4.873 (4.166-5.581) | 11.39 (11.05-11.72) | 5.27 (4.46-6.07) |
| 2015 | 5.464 (4.414-6.513) | 5.57 (4.827-6.314) | 13.72(13.35-14.09) | 5.796 (4.983-6.6) |
| 2016 | 5.162 (4.163-6.162) | 6.053 (5.293-6.813) | 15.2 (14.81-15.58) | 6.763 (5.9-7.62) |
| 2017 | 5.894 (4.873-6.915) | 6.831 (6.035-7.627) | 16.45 (16.06-16.85) | 7.54 (6.65-42) |
| 2018 | 6.431 (5.38-7.482) | 7.592 (6.766-8.419) | 17.12 (16.72-17.51) | 7.486 (6.628-8.34) |
| 2019 | 6.143 (5.153-7.134) | 7.94 (7.112-8.769) | 18.79 (18.38-19.21) | 8.299 (7.417-9.2) |
| 2020 | 7.521 (6.457-8.586) | 10.049 (9.138-10.96) | 22.07 (21.62-22.51) | 10.567 (9.583-11.5) |
| 2021 | 7.435 (6.352-8.518) | 10.874 (9.899-11.849) | 21.63 (21.18-22.08) | 9.956 (8.997-10.91) |
| 2022 | 7.829 (6.77-8.888) | 9.84 (8.938-10.742) | 21.75 (21.32-22.19) | 8.893 (8.018-9.76) |
| 2023 | 6.674 (5.719-7.629) | 10.694 (9.763-11.624) | 20.32 (19.90-20.74) | 8.563 (7.722-9.40) |
| 2024 | 7.624 (6.646-8.601) | 10.623 (9.722-11.524) | 21.29 (20.87-21.71) | 8.62 (7.806-9.43) |
| 2025 | 7.251 (6.296-8.206) | 10.589 (9.69-11.488) | 21.46 (21.04-21.88) | 9.059 (8.222-9.89) |

*Abbreviations: CI, Confidence Interval*

**Table 6.** Age-adjusted mortality rates per 100,000, stratified by state in the United States, 1999 to 2025

| Age-Adjusted Mortality Rate (95% CI) | | |
| --- | --- | --- |
| **State** | **1999-2020** | **2021-2025** |
| Alabama | 5.578 (5.19-5.966) | 17.279 (16.009-18.549) |
| Alaska | 14.148 (11.789-16.507) | 22.949 (18.279-28.449) |
| Arizona | 8.267 (7.862-8.672) | 19.205 (18.151-20.258) |
| Arkansas | 5.975 (5.471-6.478) | 16.517 (14.932-18.102) |
| California | 8.46 (8.277-8.643) | 16.797 (16.324-17.271) |
| Colorado | 10.98 (10.385-11.575) | 29.697 (28.001-31.394) |
| Connecticut | 7.038 (6.56-7.517) | 16.198 (14.801-17.595) |
| Delaware | 9.025 (7.916-10.135) | 23.683 (20.543-26.823) |
| District of Columbia | 4.512 (3.536-5.673) | 11.494 (8.446-15.285) |
| Florida | 6.134 (5.958-6.311) | 13.888 (13.414-14.361) |
| Georgia | 7.339 (6.97-7.7) | 19.554 (18.532-20.576) |
| Hawaii | 7.135 (6.365-7.905) | 15.675 (13.653-17.697) |
| Idaho | 14.12 (12.982-15.259) | 29.449 (26.657-32.242) |
| Illinois | 6.549 (6.287-6.811) | 15.758 (14.983-16.533) |
| Indiana | 8.704 (8.282-9.125) | 17.765 (16.626-18.905) |
| Iowa | 12.676 (11.998-13.354) | 29.155 (27.129-31.181) |
| Kansas | 6.546 (6.011-7.08) | 21.156 (19.287-23.025) |
| Kentucky | 7.121 (6.651-7.59) | 18.089 (16.685-19.493) |
| Louisiana | 4.685 (4.303-5.067) | 13.056 (11.847-14.265) |
| Maine | 11.407 (10.444-12.369) | 22.248 (19.794-24.702) |
| Maryland | 6.195 (5.806-6.583) | 19.105 (17.871-20.338) |
| Massachusetts | 8.42 (8.012-8.812) | 20.502 (19.345-21.659) |
| Michigan | 10.089 (9.733-10.446) | 24.381 (23.326-25.435) |
| Minnesota | 19.781 (19.086-20.477) | 41.903 (40.032-43.774) |
| Mississippi | 3.83 (3.41-4.252) | 10.181 (8.87-11.491) |
| Missouri | 6.642 (6.272-7.011) | 17.732 (16.582-18.882) |
| Montana | 9.265 (8.221-10.309) | 22.677 (19.721-25.633) |
| Nebraska | 10.982 (10.128-11.835) | 27.377 (24.764-29.99) |
| Nevada | 6.906 (6.258-7.554) | 16.645 (14.99-18.301) |
| New Hampshire | 12.496 (11.401-13.592) | 26.533 (23.704-29.361) |
| New Jersey | 4.019 (3.782-4.256) | 9.338 (8.652-10.024) |
| New Mexico | 8.108 (7.373-8.843) | 16.116 (14.277-17.954) |
| New York | 4.267 (4.102-4.431) | 11.595 (11.084-12.105) |
| North Carolina | 9.445 (9.075-9.816) | 25.241 (24.16-26.323) |
| North Dakota | 9.808 (8.525-11.091) | 19.944 (16.406-23.482) |
| Ohio | 7.592 (7.31-7.873) | 21.89 (20.963-22.816) |
| Oklahoma | 6.738 (6.253-7.224) | 21.911 (20.235-23.587) |
| Oregon | 15.604 (14.898-16.309) | 35.355 (33.411-37.299) |
| Pennsylvania | 5.938 (5.715-6.161) | 15.123 (14.426-15.82) |
| Rhode Island | 10.712 (9.648-11.776) | 19.248 (16.487-22.008) |
| South Carolina | 11.121 (10.553-11.689) | 24.903 (23.428-26.379) |
| South Dakota | 12.282 (10.972-13.593) | 35.141 (30.82-39.462) |
| Tennessee | 8.395 (7.973-8.818) | 23.819 (22.511-25.127) |
| Texas | 7.572 (7.34-7.8) | 18.548 (17.915-19.181) |
| Utah | 13.312 (12.341-14.284) | 28.55 (26.059-31.038) |
| Vermont | 16.877 (15.088-18.667) | 39.8 (34.815-44.785) |
| Virginia | 7.883 (7.505-8.26) | 20.2 (19.12-21.276) |
| Washington | 14.684 (14.13-15.237) | 31.804 (30.349-33.259) |
| West Virginia | 6.32 (5.71-6.93) | 15.319 (13.455-17.184) |
| Wisconsin | 12.619 (12.099-13.139) | 28.088 (26.608-29.568) |
| Wyoming | 7.855 (6.449-9.262) | 22.627 (18.34-26.914) |

*Abbreviations: CI, Confidence Interval*

**Table 7.** Place of Death stratified by the United States, 1999 to 2025

| **Place of Death** | **Deaths** | **Percentage of total deaths** |
| --- | --- | --- |
| Medical Facility - Dead on Arrival | 62 | 0.05% |
| Place of death unknown | 104 | 0.08% |
| Medical Facility - Outpatient or ER | 1061 | 0.85% |
| Other | 10179 | 8.14% |
| Medical Facility - Inpatient | 11164 | 8.93% |
| Hospice facility | 11529 | 9.22% |
| Decedent's home | 44617 | 35.67% |
| Nursing home/long term care | 46356 | 37.06% |

**Table 8:** Annual Percentage Changes (APCs) in Other Specified Degenerative Nervous System Diseases Related Mortality Trends in the United States, 1999-2025

| **Year Interval** | **APC (95% CI)** | **p-value** |
| --- | --- | --- |
| **OVERALL** | | |
| 1999-2007 | 55.0197* (37.0992 - 75.2827) | < 0.000001 |
| 2007-2020 | 11.3264* (9.3652 - 13.3228) | < 0.000001 |
| 2020-2025 | -0.9752 (-5.1262 - 3.3574) | 0.637408 |
| **AAPC (95% CI)** | | |
| 1999-2025 | 20.5206* (16.1231 - 25.0847) | < 0.000001 |
| **FEMALE** | | |
| 1999-2007 | 45.4329* (30.5338 - 62.0327) | 0.000001 |
| 2007-2020 | 12.0506* (10.0695 - 14.0674) | < 0.000001 |
| 2020-2025 | -0.7616 (-4.8759 - 3.5306) | 0.709688 |
| **AAPC (95% CI)** | | |
| 1999-2025 | 18.6093* (14.7439 - 22.6049) | < 0.000001 |
| **MALE** | | |
| 1999-2007 | 64.0205 (43.0083 - 88.1201) | < 0.000001 |
| 2007-2020 | 10.5352* (8.6217 - 12.4825) | < 0.000001 |
| 2020-2025 | -1.2117 (-5.3357 - 3.0920) | 0.556657 |
| **AAPC (95% CI)** | | |
| 1999-2025 | 22.1391* (17.2255 - 27.2587) | < 0.000001 |
| **NH ASIAN OR PACIFIC ISLANDER** | | |
| 2007-2020 | 9.5783* (7.1877 - 12.0223) | < 0.000001 |
| 2020-2025 | -0.8426 (-5.7263 - 4.2942) | 0.724728 |
| **AAPC (95% CI)** | | |
| 2007-2025 | 6.5784* (4.5309 - 8.6661) | < 0.000001 |
| **NH BLACK OR AFRICAN AMERICAN** | | |
| 2007-2015 | 20.3537* (16.1916 - 24.6649) | < 0.000001 |
| 2015-2021 | 11.5979* (7.7666 - 15.5654) | 0.000025 |
| 2021-2025 | -0.0638 (-4.0215 - 4.0572) | 0.972905 |
| **AAPC (95% CI)** | | |
| 2007-2025 | 12.6117* (10.4793 - 14.7853) | < 0.000001 |
| **NH WHITE** | | |
| 2007-2020 | 11.3427* (10.4237 - 12.2693) | < 0.000001 |
| 2020-2025 | -0.7346 (-2.9065 - 1.4858) | 0.486448 |
| **AAPC (95% CI)** | | |
| 2007-2025 | 7.8476* (7.0055 - 8.6964) | < 0.000001 |
| **HISPANIC OR LATINO** | | |
| 2007-2015 | 20.2007* (15.9120 - 24.6481) | < 0.000001 |
| 2015-2020 | 10.6668* (5.2104 - 16.4062) | 0.001042 |
| 2020-2025 | -2.6771 (-5.4665 - 0.1946) | 0.064548 |
| **AAPC (95% CI)** | | |
| 2007-2025 | 10.7816* (8.5479 - 13.0614) | < 0.000001 |
| **METROPOLITAN** | | |
| 1999-2007 | 56.1285* (36.6329 - 78.4057) | 0.000002 |
| 2007-2020 | 11.3536* (9.5415 - 13.1957) | < 0.000001 |
| **AAPC (95% CI)** | | |
| 1999-2020 | 26.6542* (20.7019 - 32.9001) | < 0.000001 |
| **NON-METROPOLITAN** | | |
| 1999-2007 | 52.5631* (35.0885 - 72.2983) | 0.000001 |
| 2007-2020 | 11.6497* (9.8940 - 13.4334) | < 0.000001 |
| **AAPC (95% CI)** | | |
| 1999-2020 | 25.7511* (20.3373 - 31.4083) | < 0.000001 |
| **CENSUS REGION 1: NORTHEAST** | | |
| 1999-2007 | 55.8223* (37.2316 - 76.9315) | 0.00001 |
| 2007-2020 | 10.1436* (7.9942 - 12.3359) | < 0.000001 |
| 2020-2025 | 0.1617 (-4.6613 - 5.2287) | 0.946084 |
| **AAPC (95% CI)** | | |
| 1999-2025 | 20.3332* (15.7556 - 25.0917) | < 0.000001 |
| **CENSUS REGION 2: MIDWEST** | | |
| 1999-2007 | 58.1456* (40.2070 - 78.3792) | < 0.000001 |
| 2007-2020 | 10.6525* (8.7347 - 12.6042) | < 0.000001 |
| 2020-2025 | -0.5100 (-4.8009 - 3.9742) | 0.810790 |
| **AAPC (95% CI)** | | |
| 1999-2025 | 21.0046* (16.6657 - 25.5049) | < 0.000001 |
| **CENSUS REGION 3: SOUTH** | | |
| 1999-2007 | 49.8890* (31.3624 - 71.0285) | 0.000004 |
| 2007-2020 | 13.7105* (11.5724 - 15.8895) | < 0.000001 |
| 2020-2025 | -1.0491 (-5.1282 - 3.2053) | 0.606089 |
| **AAPC (95% CI)** | | |
| 1999-2025 | 20.5320* (15.8327 - 25.4221) | < 0.000001 |
| **CENSUS REGION 4: WEST** | | |
| 1999-2004 | 15.6822 (-6.5366 - 43.1830) | 0.166934 |
| 2004-2007 | 100.5809* (11.0716 - 262.2234) | 0.023840 |
| 2007-2020 | 9.6003* (8.4531 - 10.7597) | < 0.000001 |
| 2020-2025 | -1.9690 (-4.4889 - 0.6174) | 0.125021 |
| **AAPC (95% CI)** | | |
| 1999-2025 | 16.2228* (7.9455 - 25.1348) | 0.000067 |

Statistically significant p-values are highlighted bold

APC, annual percent change; CI, confidence interval

**Table 9:** Characteristics of Other Specified Degenerative Nervous System Disease-Related Deaths among individuals in the United States between 1999 and 2025

| **VARIABLE** | **DEATHS (%)** | **AAMR (95% CI)** |
| --- | --- | --- |
| Other Specified Degenerative Nervous System Diseases | 125070(100%) | 9.51 (9.26-9.76) |
| **Sex** | | |
| Female | 52354 (41.86%) | 6.76 (6.49-7.04) |
| Male | 72716 (58.14%) | 13.31 (12.84-13.77) |
| **Race** | | |
| NH Asian or Pacific Islander | 2260 (1.79%) | 5.20 (4.25-6.24) |
| NH Black or African American | 5255 (4.16%) | 6.18 (5.46-6.92) |
| NH White | 114299 (90.44%) | 14.39 (14.0-14.8) |
| Hispanic or Latino | 4569 (3.62%) | 6.01 (5.25-6.81) |
| **Urbanization** | | |
| Metropolitan | 60593 (82.96%) | 7.31 (7.06-7.56) |
| Non-Metropolitan | 12439 (17.04%) | 7.09 (6.58-7.63) |
| **Census Region** | | |
| NorthEast | 18281 (14.62%) | 7.32 (6.81-7.83) |
| Midwest | 33028 (26.40%) | 11.61 (11.02-12.21) |
| South | 41980 (33.57%) | 8.49 (8.10-8.87) |
| West | 31781 (25.41%) | 11.09 (10.51-11.69) |
